# Supplementary material
Source: ML conference proceedings conference paper supplement (https://openreview.net/forum?id=MamHShmHiX)
Supplement: supplementary_material [file attachment]

---

# Supplementary material

---

**Shivani Bathla**

Department of Electrical Engineering  
Indian Institute of Technology Madras  
India, 600036  
ee13s064@ee.iitm.ac.in

**Vinita Vasudevan**

Department of Electrical Engineering  
Indian Institute of Technology Madras  
India, 600036  
vinita@ee.iitm.ac.in

## A Results

### A.1 Evaluation setup

For loopy belief propagation (LBP) [Murphy et al., 1999], we use the implementation provided in LibDAI [Mooij, 2010, 2012]. We set the tolerance limit to  $10^{-3}$  when time limit is 2 min and  $10^{-9}$  for 20 min. For iterative join graph propagation (IJGP) [Mateescu et al., 2010], we used the implementation available on the author’s webpage [Gogate, 2010]. The maximum cluster size in IJGP is set using the parameter *ibound*. This solver starts with the minimal value of *ibound* and increases it until the runtime and memory constraints are satisfied. A solution is obtained for each *ibound*. The results reported are those obtained for the largest *ibound* possible for the given time and memory constraints. For WMB, we used the implementation made available by the authors in the Merlin tool [Marinescu, 2016]. Since this implementation uses a fixed *ibound* value, we wrote a script to run it in anytime fashion similar to IJGP. We report results obtained with the largest value of *ibound* possible. For sample search with IJGP-based proposal and cutset sampling (ISSwc) [Gogate and Dechter, 2011], we used the implementation provided by the authors on Github [Gogate, 2020]. For ISSwc, appropriate values of *ibound* and *w-cutset* bound are set by the tool based on the given runtime limit.

### A.2 Additional results

For a fair comparison with IBIA using  $mcs_p$  of 20 (referred to as ‘IBIA20’), we also obtained the results for ISSwc after fixing both *ibound* and *w-cutset* bound to 20 (referred to as ‘ISSwc20’). Table 1 compares the results obtained using IBIA20, ISSwc20 and ISSwc (in which the optimal *ibound* is determined by the solver). The runtime limit was set to 2 min and 20 min, and the memory limit was set to 8 GB. The error obtained using IBIA20 is either smaller than or comparable to ISSwc20 and ISSwc for both time limits in all testcases except DBN. For DBN, in 2 min, the average  $HD_{max}$  obtained with IBIA20 is significantly smaller than both variants of sample search, and the average  $HD_{avg}$  obtained with IBIA20 is comparable. However, in 20 min, both variants reduce to exact inference in many DBN instances and the average error obtained is close to zero.

Table 2 compares the maximum Hellinger distance obtained using IBIA ( $mcs_p=15,20$ ) with published results for adaptive Rao Blackwellisation (ARB) and iterative join graph propagation in Kelly et al. [2019]. The minimum error obtained is shown in bold. IBIA with  $mcs_p = 20$  gives the least error in all cases. The error obtained with  $mcs_p = 15$  is smaller than ARB and IJGP in all testcases except Grids\_11, Grids\_13 and Promedas\_12.

Table 1: Comparison of average  $HD_{avg}$  and average  $HD_{max}$  (shown in gray background) obtained using IBIA with  $mcs_p = 20$  (IBIA20), ISSwc with clique size bounds determined by the solver [Gogate, 2020] (ISSwc) and ISSwc with *ibound* and *w-cutset* bound fixed to 20 (ISSwc20). Results are shown for two runtime limits, 2 min and 20 min. Entries are marked with ‘-’ if the solution for all testcases could not be obtained within the given time and memory limits. The minimum error obtained for a benchmark is highlighted in bold. The number of instances solved by each solver is shown in the last row.  $ev_a$ : average number of evidence variables,  $v_a$ : average number of variables,  $f_a$ : average number of factors,  $w_a$ : average induced width and  $dm_a$ : average of the maximum variable domain size.

|           | Total #Inst | $(ev_a, v_a, f_a, w_a, dm_a)$ | 2 min    |              |              | 20 min       |              |              |
|-----------|-------------|-------------------------------|----------|--------------|--------------|--------------|--------------|--------------|
|           |             |                               | ISSwc    | ISSwc20      | IBIA20       | ISSwc        | ISSwc20      | IBIA20       |
| BN        | 97          | (76,637,637,28,10)            | -        | 0.037        | <b>0</b>     | -            | 0.033        | <b>0</b>     |
|           |             |                               | -        | 0.145        | <b>0</b>     | -            | 0.085        | <b>0</b>     |
| GridBN    | 29          | (0,595,595,37,2)              | 0.003    | 0.005        | <b>0</b>     | 0.001        | 0.005        | <b>0</b>     |
|           |             |                               | 0.051    | 0.065        | <b>0</b>     | 0.015        | 0.046        | <b>0</b>     |
| Bnlearn   | 26          | (0,256,256,7,16)              | 0.012    | 0.036        | <b>0</b>     | 0.006        | 0.036        | <b>0</b>     |
|           |             |                               | 0.064    | 0.094        | <b>0.002</b> | 0.028        | 0.093        | <b>0.002</b> |
| Pedigree  | 24          | (154,853,853,24,5)            | 0.033    | 0.028        | <b>0.009</b> | 0.021        | 0.021        | <b>0.009</b> |
|           |             |                               | 0.292    | 0.245        | <b>0.204</b> | 0.234        | <b>0.195</b> | 0.204        |
| Promedas  | 64          | (7,618,618,21,2)              | 0.030    | 0.042        | <b>0.013</b> | 0.021        | 0.033        | <b>0.013</b> |
|           |             |                               | 0.139    | 0.207        | <b>0.086</b> | 0.096        | 0.153        | <b>0.086</b> |
| DBN       | 36          | (653,719,14205,29,2)          | 0.016    | <b>0.011</b> | 0.020        | <b>0</b>     | <b>0</b>     | 0.020        |
|           |             |                               | 0.766    | 0.833        | <b>0.261</b> | <b>0</b>     | <b>0</b>     | 0.261        |
| ObjDetect | 79          | (0,60,210,6,16)               | 0.018    | 0.039        | <b>0.002</b> | 0.009        | 0.004        | <b>0.002</b> |
|           |             |                               | 0.189    | 0.233        | <b>0.020</b> | 0.061        | 0.021        | <b>0.020</b> |
| Grids     | 8           | (0,250,728,22,2)              | -        | -            | <b>0.088</b> | <b>0.056</b> | -            | 0.088        |
|           |             |                               | -        | -            | <b>0.300</b> | <b>0.209</b> | -            | 0.300        |
| CSP       | 12          | (0,73,369,12,4)               | -        | -            | <b>0.002</b> | 0.054        | 0.069        | <b>0.002</b> |
|           |             |                               | -        | -            | <b>0.011</b> | 0.093        | 0.081        | <b>0.011</b> |
| Segment   | 50          | (0,229,851,17,2)              | <b>0</b> | 0.002        | <b>0</b>     | <b>0</b>     | <b>0</b>     | <b>0</b>     |
|           |             |                               | <b>0</b> | 0.036        | 0.001        | <b>0</b>     | <b>0</b>     | 0.001        |
| Protein   | 68          | (0,59,176,6,77)               | 0.003    | 0.003        | <b>0</b>     | 0.001        | 0.001        | <b>0</b>     |
|           |             |                               | 0.049    | <b>0.030</b> | 0.039        | 0.015        | <b>0.011</b> | 0.039        |
| #Inst     | 493         |                               | 485      | 488          | 493          | 487          | 489          | 493          |

Table 2: Comparison of maximum Hellinger distance ( $HD_{max}$ ) obtained using IBIA with published results for Gibbs sampling with adaptive Rao Blackwellisation (ARB) and iterative join graph propagation in Kelly et al. [2019]. Results obtained with  $mcs_p = 15$  and  $mcs_p = 20$  are shown in columns marked as IBIA15 and IBIA20 respectively. Runtimes (in seconds) for IBIA15 and IBIA20 are also shown. Estimates for ARB were obtained within 600 seconds<sup>+</sup> [Kelly et al., 2019] and runtime for IJGP is not reported in Kelly et al. [2019]. The minimum error obtained for each benchmark is marked in bold.  $w$ : induced width,  $dm$ : maximum domain size

|             | $w$ | $dm$ | $HD_{max}$     |       |             |              | Runtime (s) |        |
|-------------|-----|------|----------------|-------|-------------|--------------|-------------|--------|
|             |     |      | Merlin (IJGP)* | ARB*  | IBIA15      | IBIA20       | IBIA15      | IBIA20 |
| Alchemy_11  | 19  | 2    | 0.777          | 0.062 | 0.004       | <b>1E-7</b>  | 3.3         | 2.9    |
| CSP_11      | 16  | 4    | 0.513          | 0.274 | 0.100       | <b>0.034</b> | 0.5         | 3.4    |
| CSP_12      | 11  | 4    | 0.515          | 0.275 | 0.028       | <b>6E-7</b>  | 0.1         | 0.1    |
| CSP_13      | 19  | 4    | 0.503          | 0.290 | 0.085       | <b>0.051</b> | 0.9         | 2.9    |
| Grids_11    | 21  | 2    | 0.543          | 0.420 | 0.590       | <b>0.166</b> | 1.1         | 3.5    |
| Grids_12    | 12  | 2    | 0.645          | 0.432 | <b>3E-7</b> | <b>3E-7</b>  | 0.0         | 0.0    |
| Grids_13    | 21  | 2    | 0.500          | 0.544 | 0.962       | <b>0.246</b> | 1.1         | 3.6    |
| Pedigree_11 | 19  | 3    | 0.532          | 0.576 | 0.016       | <b>5E-7</b>  | 0.5         | 0.1    |
| Pedigree_12 | 19  | 3    | 0.562          | 0.506 | 0.023       | <b>4E-7</b>  | 0.3         | 0.1    |
| Pedigree_13 | 19  | 3    | 0.577          | 0.611 | 5E-7        | <b>5E-7</b>  | 0.1         | 0.1    |
| Promedus_11 | 18  | 2    | 1.000          | 0.373 | 0.049       | <b>5E-7</b>  | 1.4         | 0.5    |
| Promedus_12 | 20  | 2    | 1.000          | 0.358 | 0.657       | <b>0.242</b> | 2.8         | 4.1    |
| Promedus_13 | 10  | 2    | 1.000          | 0.432 | <b>5E-7</b> | <b>5E-7</b>  | 0.4         | 0.4    |

\* The results tabulated in Kelly et al. [2019] report  $-\log_2 HD_{max}$ . The table above has the corresponding values of  $HD_{max}$ .

<sup>+</sup> System used: Ubuntu 18.04, with 16GB of RAM, 6 CPUs and 2 hardware threads per CPU [Kelly et al., 2019].

## B Pseudo-code

Algorithm 1 shows the steps in the proposed algorithm for the inference of marginals. We first convert the PGM into a sequence of linked CTFs (*SLCTF*) that contains a sequence of calibrated CTFs (*SCTF* =  $\{CTF_k\}$ ) and a list of links between adjacent CTFs ( $SL = \{L_k\}$ ). Functions *BuildCTF* and *ApproximateCTF* are used for incremental construction of CTFs and approximation of CTFs respectively. The steps in these functions are explained in detail in Algorithms 1 and 2 in Bathla and Vasudevan [2023]. Links between adjacent CTFs are found using the function *FindLinks* and belief update in the SLCTF is performed using the function *BeliefUpdate*. Following this, the marginal of a variable  $v$  is inferred from clique beliefs in the last CTF that contains  $v$  (line 23).

## C Proofs

### Notations

|                    |                                                                                                  |
|--------------------|--------------------------------------------------------------------------------------------------|
| $\Phi_k$           | Set of factors added to construct $CTF_k$                                                        |
| $X_k$              | Set of all non-evidence variables in $CTF_k$                                                     |
| $X_{k,a}$          | Set of all non-evidence variables in $CTF_{k,a}$                                                 |
| $Y_k$              | Set of variables in $CTF_k$ but not in $CTF_1, \dots, CTF_{k-1}$                                 |
| $Pa_{Y_k}$         | Parents of variables in $Y_k$ in the BN                                                          |
| $E_k$              | Set of evidence variables in $Y_k$                                                               |
| $e_k$              | Evidence state corresponding to variables in $E_k$                                               |
| $C$                | A clique in $CTF_k$                                                                              |
| $C'$               | A clique in $CTF_{k,a}$                                                                          |
| $SP$               | Sepset associated with an edge in $CTF_k$                                                        |
| $SP'$              | Sepset associated with an edge in $CTF_{k,a}$                                                    |
| $\beta(C)$         | Unnormalized clique belief of clique $C$                                                         |
| $\beta_N(C)$       | Normalized clique belief of clique $C$ , $\beta_N(C) = \frac{\beta(C)}{\sum_{v \in C} \beta(C)}$ |
| $Z_k$              | Normalization constant of the distribution encoded by calibrated beliefs in $CTF_k$              |
| $Q_k(X_k)$         | Probability distribution corresponding to $CTF_k$                                                |
| $Q_{k,a}(X_{k,a})$ | Probability distribution corresponding to $CTF_{k,a}$                                            |

**Propositions related to inference of marginals:** Let  $CTF_k$  be a CTF in the SCTF generated by the IBIA framework and  $CTF_{k,a}$  be the corresponding approximate CTF.

**Proposition 1.** *The joint belief of variables contained within any clique in the approximate CTF  $CTF_{k,a}$  is the same as that in  $CTF_k$ .*

*Proof.* The approximation algorithm has two steps, exact marginalization and local marginalization. Exact marginalization involves finding the joint belief by collapsing all cliques containing a variable and then marginalizing the belief by summing over the states of the variable. This does not change the belief of the remaining variables. Local marginalization involves marginalizing a variable from individual cliques and sepsets by summing over its states. Let  $C'$  denote the clique obtained after local marginalization of variable  $v$  from clique  $C$ . The updated clique belief ( $\beta(C')$ ) is computed as shown below.

$$\beta(C') = \sum_v \beta(C)$$

Once again, summing over the states of a variable does not alter the joint belief of the remaining variables in the clique. □

---

**Algorithm 1** InferMarginals ( $\Phi, mcs_p, mcs_{im}$ )

---

**Input:**  $\Phi$ : Set of factors in the PGM  
 $mcs_p$ : Maximum clique size bound for each CTF in the sequence  
 $mcs_{im}$ : Maximum clique size bound for the approximate CTF  
**Output:**  $MAR$ : Map containing marginals  $\langle variable : margProb \rangle$

- 1: Initialize:  $MAR = \langle \rangle$  ▷ Map  $\langle variable : margProb \rangle$   
 $S_v = \cup_{\phi \in \Phi} Scope(\phi)$  ▷ Set of all variables in the PGM  
 $SCTF = []$  ▷ Sequence of calibrated CTFs  
 $SL = []$  ▷ List of list of links between all adjacent CTFs  
 $k = 1$  ▷ Index of CTF in  $SCTF$
- 2: **while**  $\Phi.isNotEmpty()$  **do** ▷ Convert PGM  $\Phi$  to  $SLCTF = \{SCTF, SL\}$
- 3:   **if**  $k == 1$  **then**
- 4:      $CTF_0 \leftarrow$  Disjoint cliques corresponding to factors in  $\Phi$  with disjoint scopes
- 5:     ▷ Add factors to  $CTF_0$  using BuildCTF (Algorithm 1 in Bathla and Vasudevan [2023])
- 6:      $CTF_1, \Phi_1 \leftarrow$  BuildCTF ( $CTF_0, \Phi, mcs_p$ ) ▷  $\Phi_1$ : Subset of factors in  $\Phi$  added to  $CTF_1$
- 7:      $\Phi \leftarrow \Phi \setminus \Phi_1$  ▷ Remove factors added to  $CTF_1$  from  $\Phi$
- 8:   **else**
- 9:     ▷ Add factors to  $CTF_{k-1,a}$  using BuildCTF (Algorithm 1 in Bathla and Vasudevan [2023])
- 10:      $CTF_k, \Phi_k \leftarrow$  BuildCTF ( $CTF_{k-1,a}, \Phi, mcs_p$ ) ▷  $\Phi_k$ : Subset of factors in  $\Phi$  added to  $CTF_k$
- 11:      $\Phi \leftarrow \Phi \setminus \Phi_k$  ▷ Remove factors added to  $CTF_k$  from  $\Phi$
- 12:      $L_{k-1} \leftarrow$  FindLinks( $CTF_{k-1}, CTf_{k-1,a}, CTF_k$ ) ▷  $L_{k-1}$ : List of links between  $CTF_{k-1}, CTF_k$
- 13:      $SL.append(L_{k-1})$  ▷ Add  $L_{k-1}$  to the sequence of links  $SL$
- 14:   **end if**
- 15:   Calibrate  $CTF_k$  using belief propagation
- 16:    $SCTF.append(CTF_k)$  ▷ Add  $CTF_k$  to the sequence  $SCTF$
- 17:   ▷ Reduce clique sizes to  $mcs_{im}$  using ApproximateCTF (Algorithm 2 in Bathla and Vasudevan [2023])
- 18:    $CTF_{k,a} \leftarrow$  ApproximateCTF ( $CTF_k, \Phi, mcs_{im}$ )
- 19:    $k \leftarrow k + 1$
- 20: **end while**
- 21:  $SLCTF = \{SCTF, SL\}$  ▷ Sequence of linked CTFs
- 22: BeliefUpdate( $SLCTF$ ) ▷ Re-calibrate CTFs so that beliefs in all CTFs account for all factors
- 23:  $MAR[v] \leftarrow$  Find marginal of  $v$  from  $CTF_j$  s.t.  $v \in CTF_k, v \notin CTF_{k+1} \quad \forall v \in S_v$  ▷ Infer marginals
- 24:
- 25: **procedure** FINDLINKS( $CTF_{k-1}, CTf_{k-1,a}, CTF_k$ )
- 26:   ▷ Each link is a triplet consisting of  $C \in CTF_{k-1}, C' \in CTf_{k-1,a}$  and  $\tilde{C} \in CTF_k$
- 27:   **for**  $C' \in CTf_{k-1,a}$  **do** ▷ Find links corresponding to each clique  $C'$  in  $CTF_{k-1,a}$
- 28:     ▷ Find list of corresponding cliques in  $CTF_{k-1}, L_c$
- 29:     **if**  $C'.isCollapsedClique$  **then** ▷  $C'$  is obtained after exact marginalization
- 30:        $L_c \leftarrow$  List of cliques in  $CTF_{k-1}$  that were collapsed to form  $C'$
- 31:     **else** ▷  $C'$  is either obtained after local marginalization or it is present as is in  $CTF_k$
- 32:        $C \leftarrow$  Clique in  $CTF_{k-1}$  s.t.  $C' \subseteq C; L_c = [C]$
- 33:     **end if**
- 34:     Find clique  $\tilde{C}$  in  $CTF_k$  s.t.  $C' \subseteq \tilde{C}$
- 35:     ▷ Add all links corresponding to  $C'$
- 36:     **for**  $C \in L_c$  **do**  $L_{k-1}.append((C, C', \tilde{C}))$  **end for**
- 37:   **end for**
- 38:   **return**  $L_{k-1}$
- 39: **end procedure**
- 40:
- 41: **procedure** BELIEFUPDATE( $SLCTF$ )
- 42:    $SCTF, SL = SLCTF$
- 43:   **for**  $k \in len(SCTF)$  **down to** 2 **do** ▷ Update beliefs in  $\{CTF_k, k < len(SCTF)\}$
- 44:      $CTF_{k-1} \leftarrow SCTF[k-1]; CTF_k = SCTF[k]; L_{k-1} = SL[k-1]$
- 45:      $L_s \leftarrow$  Priority queue with subset of links in  $L_{k-1}$  chosen using heuristics described in Section 3.2
- 46:     **for**  $(C, C', \tilde{C}) \in L_s$  **do** ▷ Back-propagate beliefs from  $CTF_k$  to  $CTF_{k-1}$  via all selected links
- 47:        $\beta(C) = \frac{\beta(C)}{\sum_{C \setminus \{C \cap C'\}} \beta(C)} \sum_{\tilde{C} \setminus \{C \cap C'\}} \beta(\tilde{C})$  ▷ Update  $\beta(C) \in CTF_{k-1}$  based on  $\beta(\tilde{C}) \in CTF_k$
- 48:       Update belief of all other cliques in  $CTF_{k-1}$  using single pass message passing with  $C$  as root
- 49:     **end for**
- 50:   **end for**
- 51: **end procedure**

---

**Proposition 2.** *The clique beliefs in  $CTF_k$  account for all factors added to  $\{CTF_1, \dots, CTF_k\}$ .*

*Proof.*  $CTF_1$  is constructed by adding factors to an initial CTF that contains a set of disjoint cliques corresponding to a subset of factors with disjoint scopes. Let  $\Phi_1$  be the set of all factors present in  $CTF_1$  and  $Z_1$  be the corresponding normalization constant. After calibration, the normalized clique belief ( $\beta_N(C)$ ) of any clique  $C$  in  $CTF_1$  can be computed as follows.

$$\beta_N(C) = \frac{1}{Z_1} \sum_{X_1 \setminus C} \frac{\prod_{C_i \in CTF_1} \beta(C_i)}{\prod_{SP \in CTF_1} \mu(SP)} = \frac{1}{Z_1} \sum_{X_1 \setminus C} \prod_{\phi \in \Phi_1} \phi$$

Therefore, clique beliefs in  $CTF_1$  account for all factors in  $\Phi_1$ .

$CTF_{1,a}$  is a calibrated CTF (refer Proposition 6, Bathla and Vasudevan [2023]) that is obtained after approximate marginalization of the variables in  $X_1 \setminus X_{1,a}$ . Therefore, the joint distribution of variables in  $CTF_{1,a}$  also accounts for all factors in  $\Phi_1$ .  $CTF_2$  is constructed by adding factors in  $\Phi_2$  to  $CTF_{1,a}$ . Therefore, after calibration, the normalized clique belief ( $\beta_N(C)$ ) of any clique  $C$  in  $CTF_2$  can be computed as follows.

$$\beta_N(C) = \frac{1}{Z_2} \sum_{X_2 \setminus C} \frac{\prod_{C' \in CTF_{1,a}} \beta(C')}{\prod_{SP' \in CTF_{1,a}} \mu(SP')} \prod_{\phi \in \Phi_2} \phi \quad (1)$$

where,  $Z_2$  is the normalization constant of the distribution in  $CTF_2$ . Using equation 1, the clique beliefs in  $CTF_2$  accounts for all factors in  $\Phi_1$  and  $\Phi_2$ .

A similar procedure can be repeated for subsequent CTFs to show that the proposition holds true for all CTFs in the sequence.  $\square$

### Propositions related inference in BNs:

The following propositions hold true for Bayesian networks when **each CTF in the SCTF is constructed by adding factors or conditional probability distributions (CPD) of variables in the topological order**.  $Y_k$  denotes the set of variables whose CPDs are added during construction of  $CTF_k$  and  $e_k$  denotes the evidence states of all evidence variables in  $Y_k$ .

**Proposition 3.** *The product of factors added in CTFs,  $\{CTF_1, \dots, CTF_k\}$  is a valid joint probability distribution whose normalization constant is the probability of evidence states  $e_1, \dots, e_k$ .*

*Proof.* Let  $\mathcal{Y}_k = \{Y_1, \dots, Y_k\}$  and  $\varepsilon_k = \{e_1, \dots, e_k\}$ . Since CTFs are constructed by adding CPDs of variables in the topological order, the CPDs of parents  $Pa_{Y_k}$  are present in  $\{CTF_1, \dots, CTF_k\}$ . Therefore, the product of the CPDs is the unnormalized joint probability distribution  $P(\mathcal{Y}_k, \varepsilon_k)$ . Since the CPDs of all non-evidence variables are normalized to one, the normalization constant is  $P(\varepsilon_k)$ .  $\square$

**Proposition 4.** *The normalization constant of the distribution encoded by the calibrated beliefs in  $CTF_k$  is the estimate of probability of evidence states  $e_1, \dots, e_k$ .*

*Proof.* The initial factors assigned to  $CTF_1$  are CPDs of variables in  $Y_1$ . Therefore, using Proposition 3, the NC obtained after calibration is  $Z_1 = P(e_1)$ .

$CTF_{1,a}$  is obtained after approximation of  $CTF_1$ . All CTs in  $CTF_{1,a}$  are calibrated CTs and the normalization constant of the distribution in  $CTF_{1,a}$  is same as that of  $CTF_1$  (refer Propositions 6 and 9 in Bathla and Vasudevan [2023]). However, due to local marginalization, the overall distribution represented by  $CTF_{1,a}$  is approximate. The probability distribution corresponding to  $CTF_{1,a}$  can be written as follows.

$$\begin{aligned} Q_{1,a}(X_{1,a}|e_1) &= \frac{1}{Z_1} \frac{\prod_{C' \in CTF_{1,a}} \beta(C')}{\prod_{SP' \in CTF_{k,a}} \mu(SP')} \\ \implies Z_1 Q_{1,a}(X_{1,a}|e_1) &= Q_{1,a}(X_{1,a}, e_1) \end{aligned} \quad (2)$$

where  $X_{1,a}$  is the set of variables in  $CTF_{1,a}$ .

$CTF_2$  is obtained after adding a new set of CPDs of variables in  $Y_2$  to  $CTF_{1,a}$ . Let  $X_2 = X_{1,a} \cup \{Y_2 \setminus E_2\}$  denote the set of non-evidence variables in  $CTF_2$  and  $Pa_{Y_2}$  denote the parents of variables in  $Y_2$ . The NC of the distribution encoded by  $CTF_2(Z_2)$  can be computed as follows.

$$\begin{aligned} Z_2 &= \sum_{X_2} \frac{\prod_{C' \in CTF_{1,a}} \beta(C')}{\prod_{SP' \in CTF_{1,a}} \mu(SP')} \prod_{y \in Y_2} P(y|Pa_y) \\ &= \sum_{X_2} Q_{1,a}(X_{1,a}, e_1) P(Y_2, e_2 | Pa_{Y_2}) \quad (\text{using Equation 2}) \end{aligned} \quad (3)$$

where  $e_2$  are evidence states in  $Y_2$ . Since  $X_2 = X_{1,a} \cup \{Y_2 \setminus E_2\}$  and parent variables in  $Pa_{Y_2}$  are present either in  $X_{1,a}$  or  $Y_2$ , the above equation can be re-written as follows.

$$Z_2 = \sum_{X_2} Q_2(X_2, e_1, e_2) = Q(e_1, e_2)$$

Therefore, the NC of  $CTF_2$  is an estimate of probability of evidence states  $e_1$  and  $e_2$ .

A similar procedure can be repeated for subsequent CTFs to show that the property holds true for all CTFs in the sequence.  $\square$

**Theorem 1.** Let  $I_E$  denote the index of the last CTF in the sequence where the factor corresponding to an evidence variable is added. The posterior marginals of variables present in CTFs  $\{CTF_k, k \geq I_E\}$  are preserved and can be computed from any of these CTFs.

*Proof.* Let  $\varepsilon_{I_E} = \{e_1, \dots, e_{I_E}\}$  be the set of all evidence states. Let  $v$  be a variable present in cliques  $C_v \in CTF_{I_E}$ ,  $C'_v \in CTF_{I_E,a}$  and  $\tilde{C}_v \in CTF_{I_E+1}$  and let  $\beta_N(C_v)$ ,  $\beta_N(C'_v)$  and  $\beta_N(\tilde{C}_v)$  be the corresponding normalized clique beliefs. From Proposition 1, the unnormalized belief of variable  $v$  in  $C_v$  is same as that in  $C'_v$ . Therefore, the normalized posterior marginal of  $v$  obtained from  $C_v$  (denoted as  $Q_{I_E}(v|\varepsilon_{I_E})$ ) is the same as that obtained from  $C'_v$ , as given below.

$$Q_{I_E}(v|\varepsilon_{I_E}) = \sum_{C_v \setminus v} \beta_N(C_v) = \sum_{C'_v \setminus v} \beta_N(C'_v) \quad (4)$$

Since  $CTF_{I_E,a}$  is calibrated (Proposition 6 in Bathla and Vasudevan [2023]) and  $CTF_{I_E+1}$  is obtained by adding CPDs of variables in  $Y_{I_E+1}$  to  $CTF_{I_E,a}$ , the NC of  $CTF_{I_E+1}$  can be computed by summing over all non-evidence variables as follows.

$$\begin{aligned} Z_{I_E+1} &= \sum_{X_{I_E,a}} \frac{\prod_{C' \in CTF_{I_E,a}} \beta(C')}{\prod_{SP' \in CTF_{I_E,a}} \mu(SP')} \sum_{Y_{I_E+1} \setminus E_{I_E+1}} P(Y_{I_E+1}, e_{I_E+1} | Pa_{Y_{I_E+1}}) \\ &= \sum_{X_{I_E,a}} \frac{\prod_{C' \in CTF_{I_E,a}} \beta(C')}{\prod_{SP' \in CTF_{I_E,a}} \mu(SP')} \quad (\because E_{I_E+1} = \emptyset, \sum_{Y_{I_E+1}} P(Y_{I_E+1} | Pa_{Y_{I_E+1}}) = 1) \\ &= Z_{I_E} \quad (\text{using Proposition 9 in Bathla and Vasudevan [2023]}) \end{aligned}$$

Therefore, the posterior marginal of  $v$  in  $CTF_{I_E+1}$  (denoted as  $Q_{I_E+1}(v|\varepsilon_{I_E})$ ) can be computed from the clique belief of  $\tilde{C}_v$  as follows.

$$\begin{aligned} Q_{I_E+1}(v|\varepsilon_{I_E}) &= \sum_{\tilde{C}_v \setminus v} \beta_N(\tilde{C}_v) \\ &= \sum_{X_{I_E,a} \setminus v} \frac{1}{Z_{I_E}} \frac{\prod_{C' \in CTF_{I_E,a}} \beta(C')}{\prod_{SP' \in CTF_{I_E,a}} \mu(SP')} \sum_{Y_{I_E+1} \setminus E_{I_E+1}} P(Y_{I_E+1}, e_{I_E+1} | Pa_{Y_{I_E+1}}) \\ &= \sum_{C'_v \setminus v} \beta_N(C'_v) \quad (\because C'_v \in CTF_{I_E,a} \text{ and } E_{I_E+1} = \emptyset) \\ &= Q_{I_E}(v|\varepsilon_{I_E}) \quad (\text{using Equation 4}) \end{aligned}$$

The above procedure can be repeated to show that the posterior marginal of  $v$  is also consistent in all subsequent CTFs that contain  $v$ .  $\square$

## References

- Shivani Bathla and Vinita Vasudevan. IBIA: An incremental build-infer-approximate framework for approximate inference of partition function. *Transactions on Machine Learning Research*, 2023. ISSN 2835-8856.
- Vibhav Gogate. Iterative join graph propagation. <https://personal.utdallas.edu/~vibhav.gogate/ijgp.html>, 2010. Accessed: 2023-04-15.
- Vibhav Gogate. IJGP-sampling and samplesearch (PR and MAR tasks). <https://github.com/dechterlab/ijgp-samplesearch>, 2020. Accessed: 2023-01-15.
- Vibhav Gogate and Rina Dechter. Samplesearch: Importance sampling in presence of determinism. *Artificial Intelligence*, 175(2):694–729, 2011.
- Craig Kelly, Somdeb Sarkhel, and Deepak Venugopal. Adaptive Rao-Blackwellisation in Gibbs sampling for probabilistic graphical models. In *Artificial Intelligence and Statistics*, pages 2907–2915. PMLR, 2019.
- Radu Marinescu. Merlin. <https://github.com/radum2275/merlin/>, 2016. Accessed: 2021-10-15.
- Robert Mateescu, Kalev Kask, Vibhav Gogate, and Rina Dechter. Join-graph propagation algorithms. *Journal of Artificial Intelligence Research*, 37:279–328, 2010.
- Joris M. Mooij. libDAI: A free and open source C++ library for discrete approximate inference in graphical models. *Journal of Machine Learning Research*, 11:2169–2173, August 2010.
- Joris M. Mooij. libDAI - A free/open source C++ library for discrete approximate inference. <https://github.com/dbtsai/libDAI/>, 2012. Accessed: 2021-10-15.
- Kevin P. Murphy, Yair Weiss, and Michael I. Jordan. Loopy belief propagation for approximate inference: An empirical study. In *Uncertainty in Artificial Intelligence*, pages 467–475, 1999.
